# Supplementary material for: Four features of temporal patterns characterize similarity among individuals and molecules by glucose ingestion in humans
Source: PubMed Central journal article supplement (PMC8826934; doi:10.1038/s41540-022-00213-0), 2022-02-08
Supplement: 41540_2022_213_MOESM2_ESM.pdf [file 41540_2022_213_MOESM2_ESM.pdf]

1 **Supplementary Information for**  
2 **“Four features of temporal patterns characterize similarity among individuals**  
3 **and molecules by glucose ingestion in humans”**  
4

5 **Authors**

6 Suguru Fujita<sup>1,†</sup>, Yasuaki Karasawa<sup>2,†</sup>, Masashi Fujii<sup>1,3,4</sup>, Ken-ichi Hironaka<sup>1</sup>, Shinsuke Uda<sup>5</sup>,  
7 Hiroyuki Kubota<sup>5</sup>, Hiroshi Inoue<sup>6</sup>, Yohei Sumitomo<sup>1</sup>, Akiyoshi Hirayama<sup>7</sup>, Tomoyoshi  
8 Soga<sup>7</sup>, Shinya Kuroda<sup>1,3,8 \*</sup>  
9

10 **Affiliations**

11 <sup>1</sup>Department of Biological Sciences, Graduate School of Science, The University of Tokyo,  
12 Tokyo, 113-0033, Japan

13 <sup>2</sup>Department of Neurosurgery, Graduate School of Medicine, The University of Tokyo,  
14 Tokyo, 113-0033, Japan

15 <sup>3</sup>Molecular Genetics Research Laboratory, Graduate School of Science, University of Tokyo,  
16 Bunkyo-ku, Tokyo 113-0033, Japan

17 <sup>4</sup>Department of Mathematical and Life Sciences, Graduate School of Integrated Sciences for  
18 Life, Hiroshima University, Hiroshima, 739-8526, Japan

19 <sup>5</sup>Division of Integrated Omics, Research Center for Transomics Medicine, Medical Institute  
20 of Bioregulation, Kyusyu University, Fukuoka, 812-8582, Japan

21 <sup>6</sup>Metabolism and Nutrition Research Unit, Institute for Frontier Science Initiative, Kanazawa  
22 University, Ishikawa, 920-8640, Japan

23 <sup>7</sup>Institute for Advanced Biosciences, Keio University, Tsuruoka, Yamagata, 997-0052, Japan

24 <sup>8</sup>CREST, Japan Science and Technology Agency, Tokyo, 113-0033, Japan

25 Correspondence: Shinya Kuroda ([skuroda@bs.s.u-tokyo.ac.jp](mailto:skuroda@bs.s.u-tokyo.ac.jp))

26 <sup>†</sup>These authors contributed equally.  
27

28 **Corresponding Author:**

29 \*Correspondence: [skuroda@bs.s.u-tokyo.ac.jp](mailto:skuroda@bs.s.u-tokyo.ac.jp)  
30

31 **This file includes Supplementary Figures 1–9.**

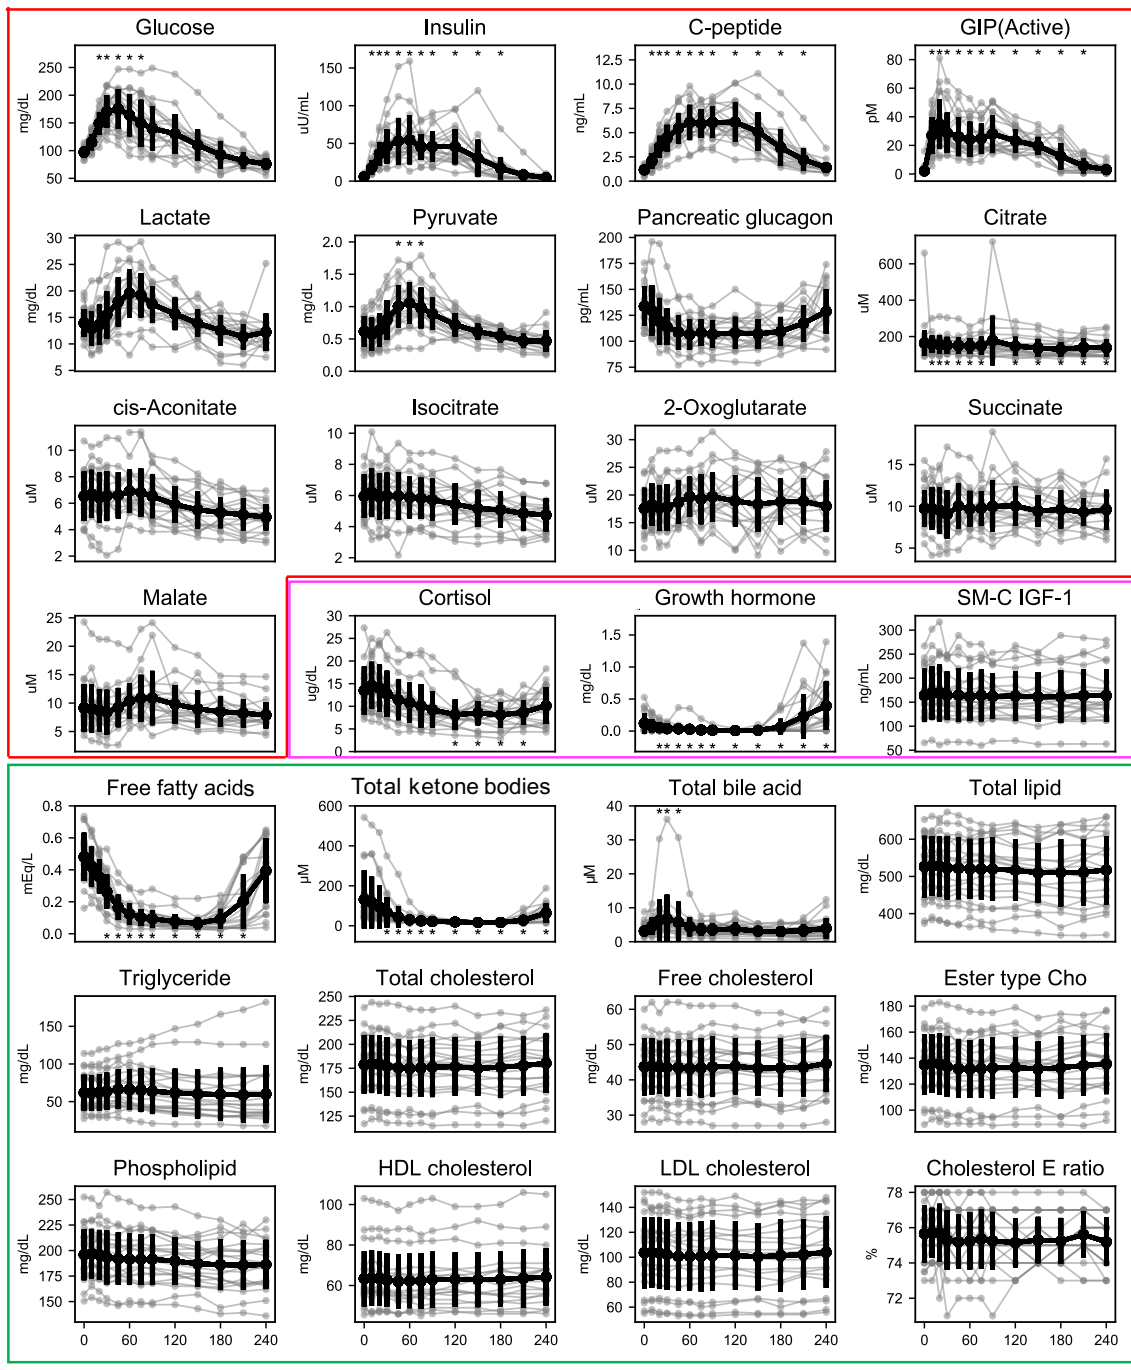

Time (min)

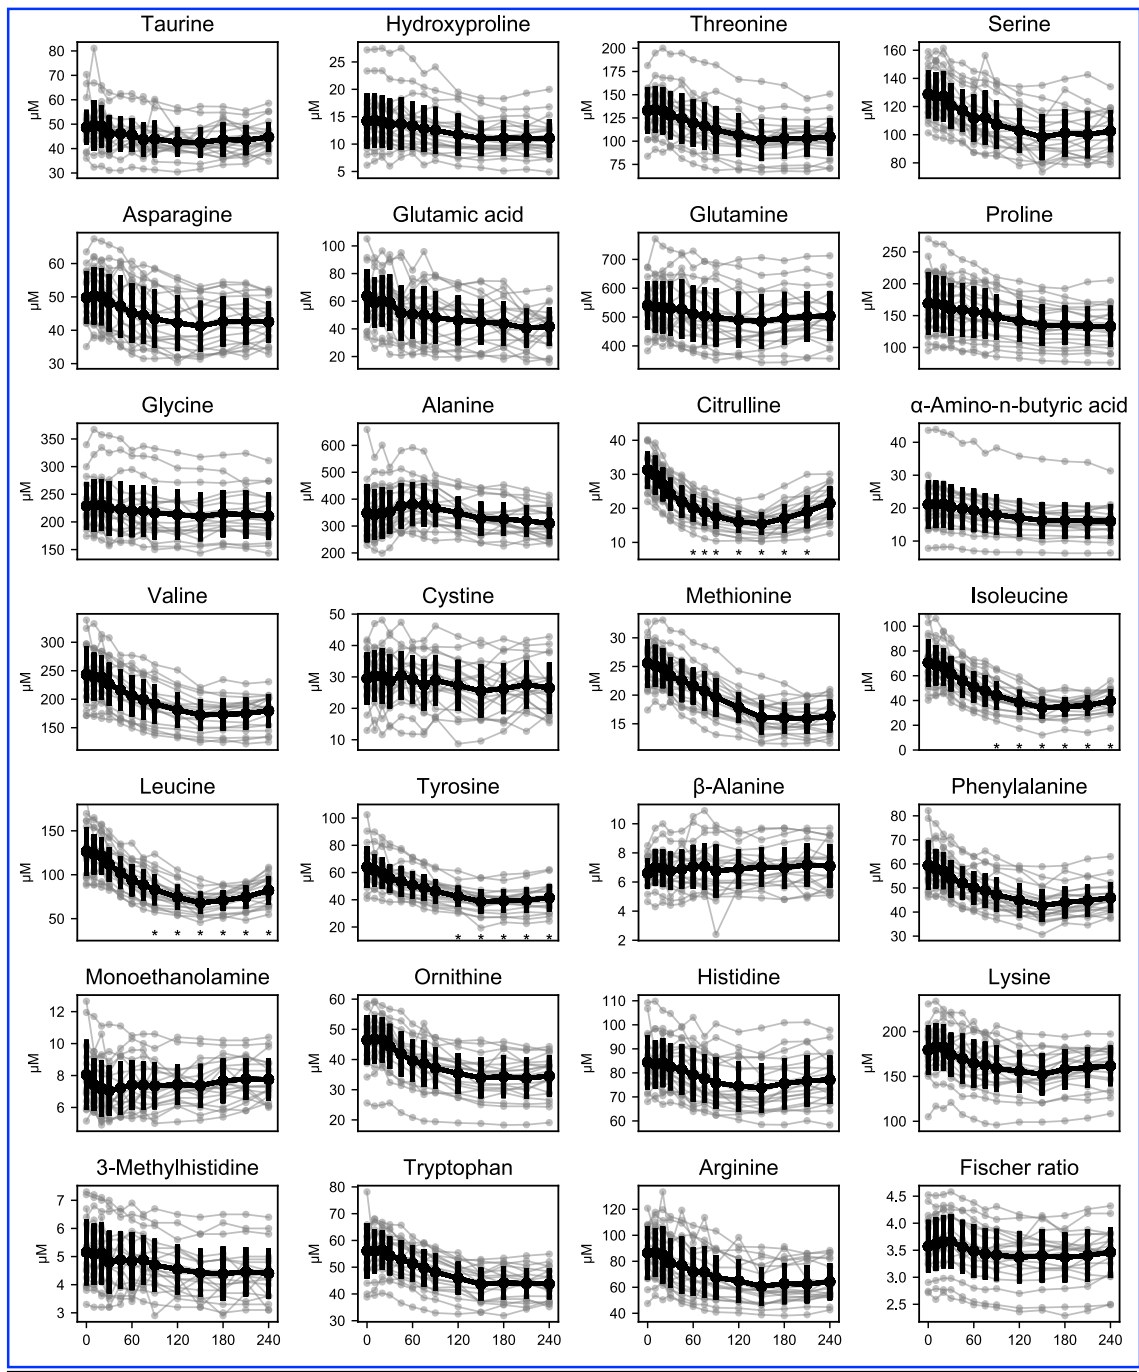

Time (min)

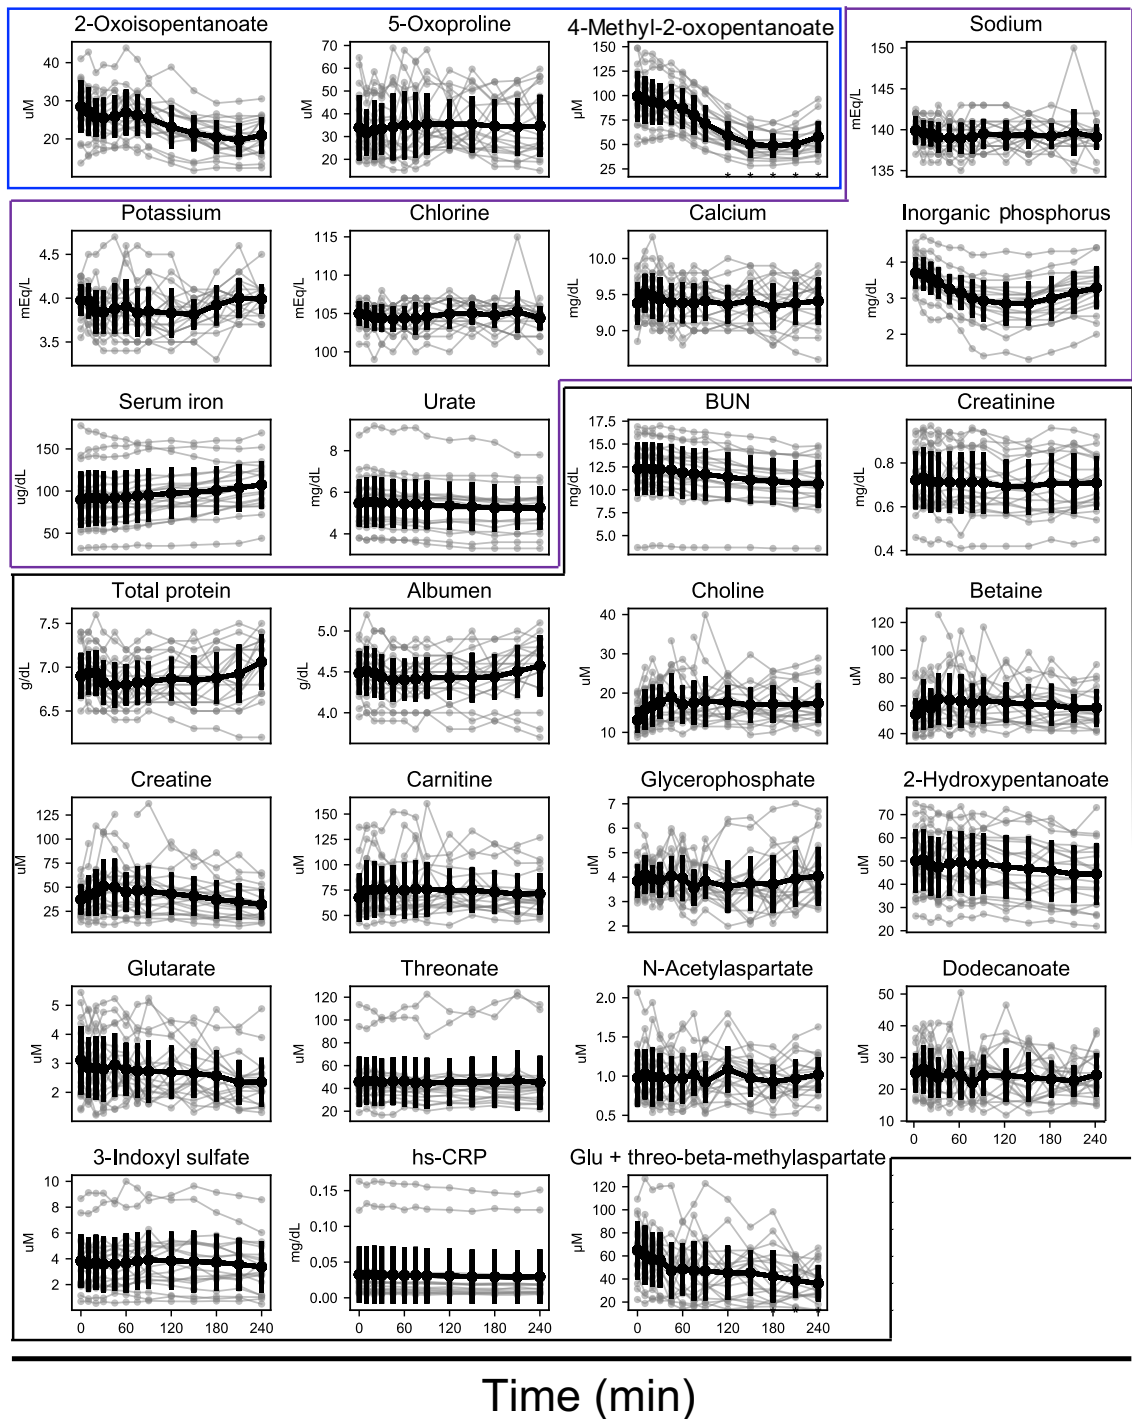

42

43

44 **Supplementary Figure 1 Time courses of all 83 blood molecules in 20 subjects**  
 45 **by glucose ingestion**

46 Time courses of all 83 blood molecules by glucose ingestion in 20 healthy human subjects.

47 For each graph, the gray lines represent each subject and the black line is the mean with a

48 standard deviation of 20 subjects. The graphs are grouped in colored boxes as follows: Red  
49 box, glucose metabolism-related molecules; green box, lipids; blue box, amino acids; pink  
50 box, hormones; purple box, ions; black box, other metabolites. The asterisks indicate the  
51 time points when molecules showed an absolute log<sub>2</sub> fold change to the value at fasting state  
52 greater than 0.585 ( $2^{0.585} = 1.5$ ) and a false discovery related- (FDR-) adjusted *p* value (*q*  
53 value) less than 0.1 (Supplementary Figure 3). Abbreviations for the molecules are follows:  
54 GIP (active), gastric inhibitory polypeptide (active), SM-C IGF-1, somatomedin-C insulin-  
55 like growth factor I; ester type Cho, ester type cholesterol; HDL cholesterol, high density  
56 lipoprotein cholesterol; LDL cholesterol, low density lipoprotein cholesterol; cholesterol E  
57 ratio, cholesterol ester ratio; BUN, blood urea nitrogen; hs-CRP, high-sensitivity C-reactive  
58 protein; Glu, glutamic acid. Abbreviations for the units are follows: mg/dL, milligrams per  
59 deciliter;  $\mu$ U/mL, microunits per milliliter; ng/mL, nanograms per milliliter; pM, pico molar;  
60 pg/mL, pico grams per milliliter;  $\mu$ M, micromolar;  $\mu$ g/dL, micrograms per deciliter; mEq/L,  
61 milliequivalents per liter; g/dL, grams per deciliter.

62  
63

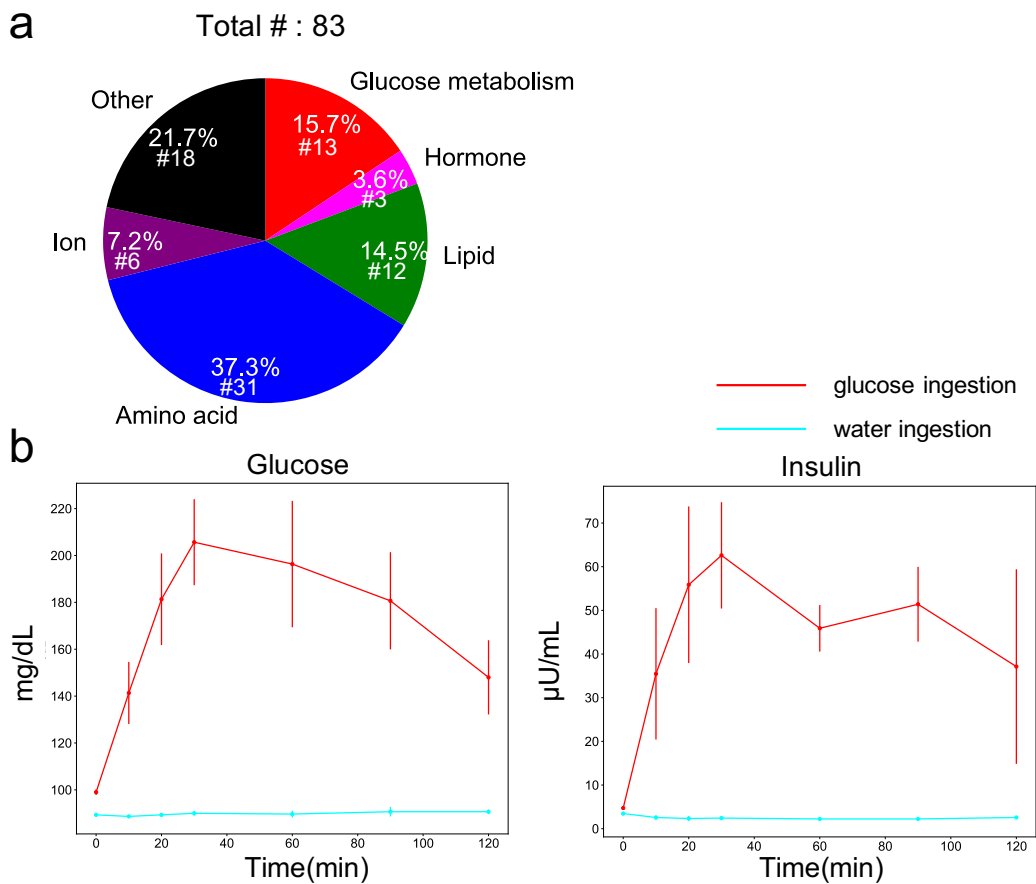

64

65

66

### Supplementary Figure 2 Classification of molecules

67

68

69

70

71

72

(a) The number and percentage of molecules included in metabolic groups. The colors of the pie sectors indicate metabolic groups. (b) Time courses of glucose and insulin to oral glucose ingestion (red) and oral water ingestion (cyan) in 3 healthy human subjects. The means and SEMs of 3 subjects are shown.

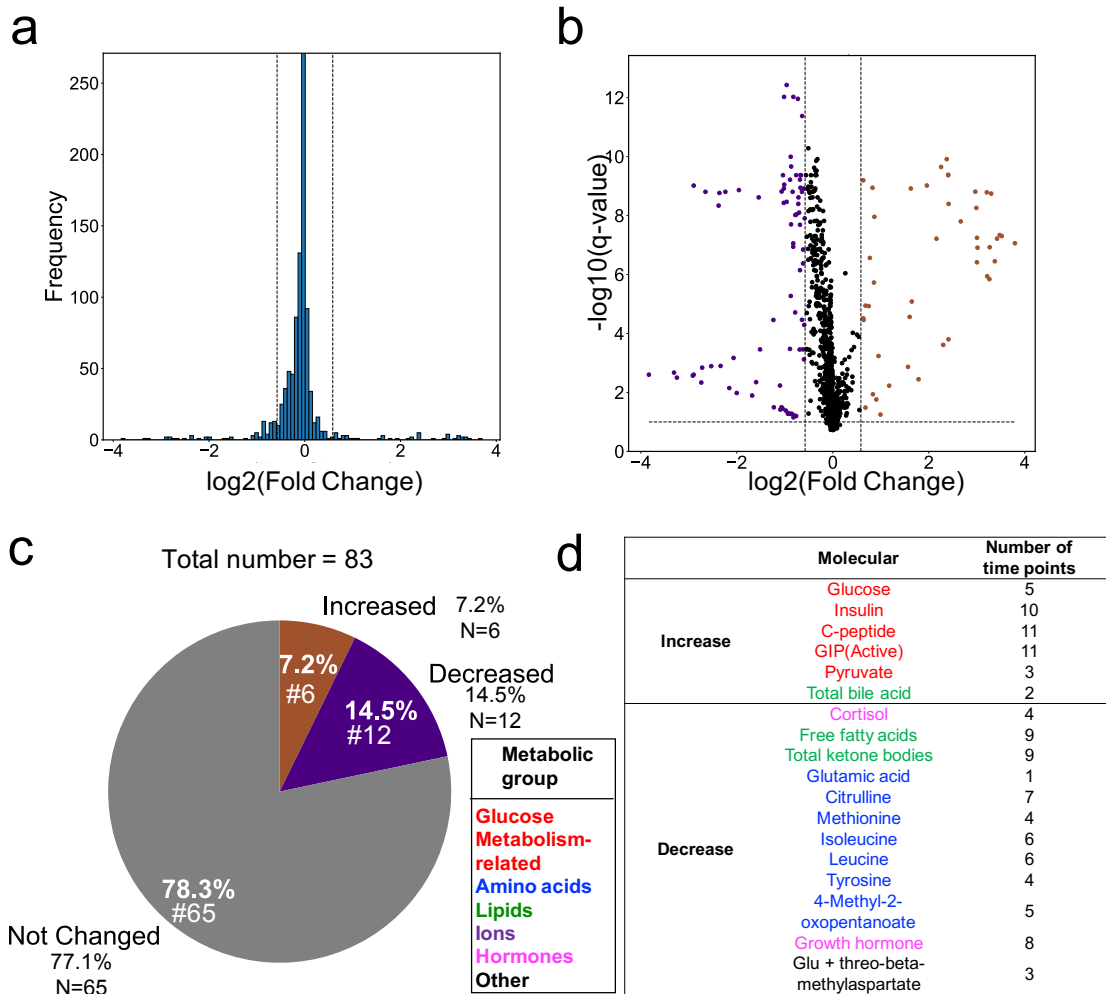

73  
74  
75 **Supplementary Figure 3 The 18 molecules that changed significantly by glucose**  
76 **ingestion**

77 (a) Distribution of mean of log<sub>2</sub> fold change of values at each time point divided by the  
78 fasting values for each molecule. The dashed line indicates that the absolute log<sub>2</sub> fold change  
79 is 0.585 ( $2^{0.585} = 1.5$ ). (b) Volcano plot of log<sub>2</sub> fold change and  $-\log_{10}$  false discovery  
80 related- (FDR-) adjusted  $p$  value ( $q$  value). The significance of the change at each time point  
81 was tested by two-tailed paired  $t$ -test for each molecule. The  $q$  values were calculated by  
82 Storey's procedure (Storey, 2002). Molecules that showed an absolute log<sub>2</sub> fold change  
83 larger than 0.585 ( $2^{0.585} = 1.5$ ) and an FDR-adjusted  $p$  value ( $q$  value) less than 0.1 at any  
84 time point were defined as molecules that changed significantly after glucose ingestion. The  
85 vertical and horizontal dashed lines indicate the absolute value log<sub>2</sub> fold change of 0.585  
86 ( $2^{0.585} = 1.5$ ) and the FDR-adjusted  $p$  value ( $q$  value) of 0.1, respectively. The colors of dots  
87 indicate the increase of (brown) or decrease of (purple) a molecule at any point. (c) The

88 number and percentage of molecules that increased or decreased and did not change. The  
89 colors of the pie sectors indicate the increase of (brown) or decrease of (purple) a molecule  
90 at any point. (d) For the molecules that increased or decreased, the colors of the molecule  
91 names correspond to the metabolic groups (list at bottom left). The number of time points at  
92 which molecules showed a significant change is shown. Of the 83 molecules, 18  
93 significantly changed after glucose ingestion. We categorized those that statistically  
94 significantly changed into increased and decreased groups. If molecules showed a change by  
95 decreasing followed by an increase at different time points, such as for the free fatty acids,  
96 citrulline, and growth hormone, we included them in the decreased group. Of the 18  
97 molecules that changed significantly after glucose ingestion, 6 increased and 12 decreased.  
98 Molecules that increased (7.2%) included glucose, insulin, C-peptide, GIP, pyruvate, and  
99 total bile acid (Fig.1, Supplementary Figures 1 and 3). Molecules that decreased (14.5%)  
100 included free fatty acids, total ketone bodies, amino acids (such as leucine, isoleucine, and  
101 citrulline), and growth hormone (Fig.1, Supplementary Figures 1 and 3). We also analyzed  
102 blood molecules in healthy humans who were orally given an equivalent amount of water;  
103 the blood amino acids and lipids showed no changes (Supplementary Table 1), confirming  
104 that the changes we detected reflected a physiological response to the oral glucose ingestion.  
105 Abbreviations for the molecules are follows: GIP (active), gastric inhibitory polypeptide  
106 (active), Glu, glutamic acid.

107

108



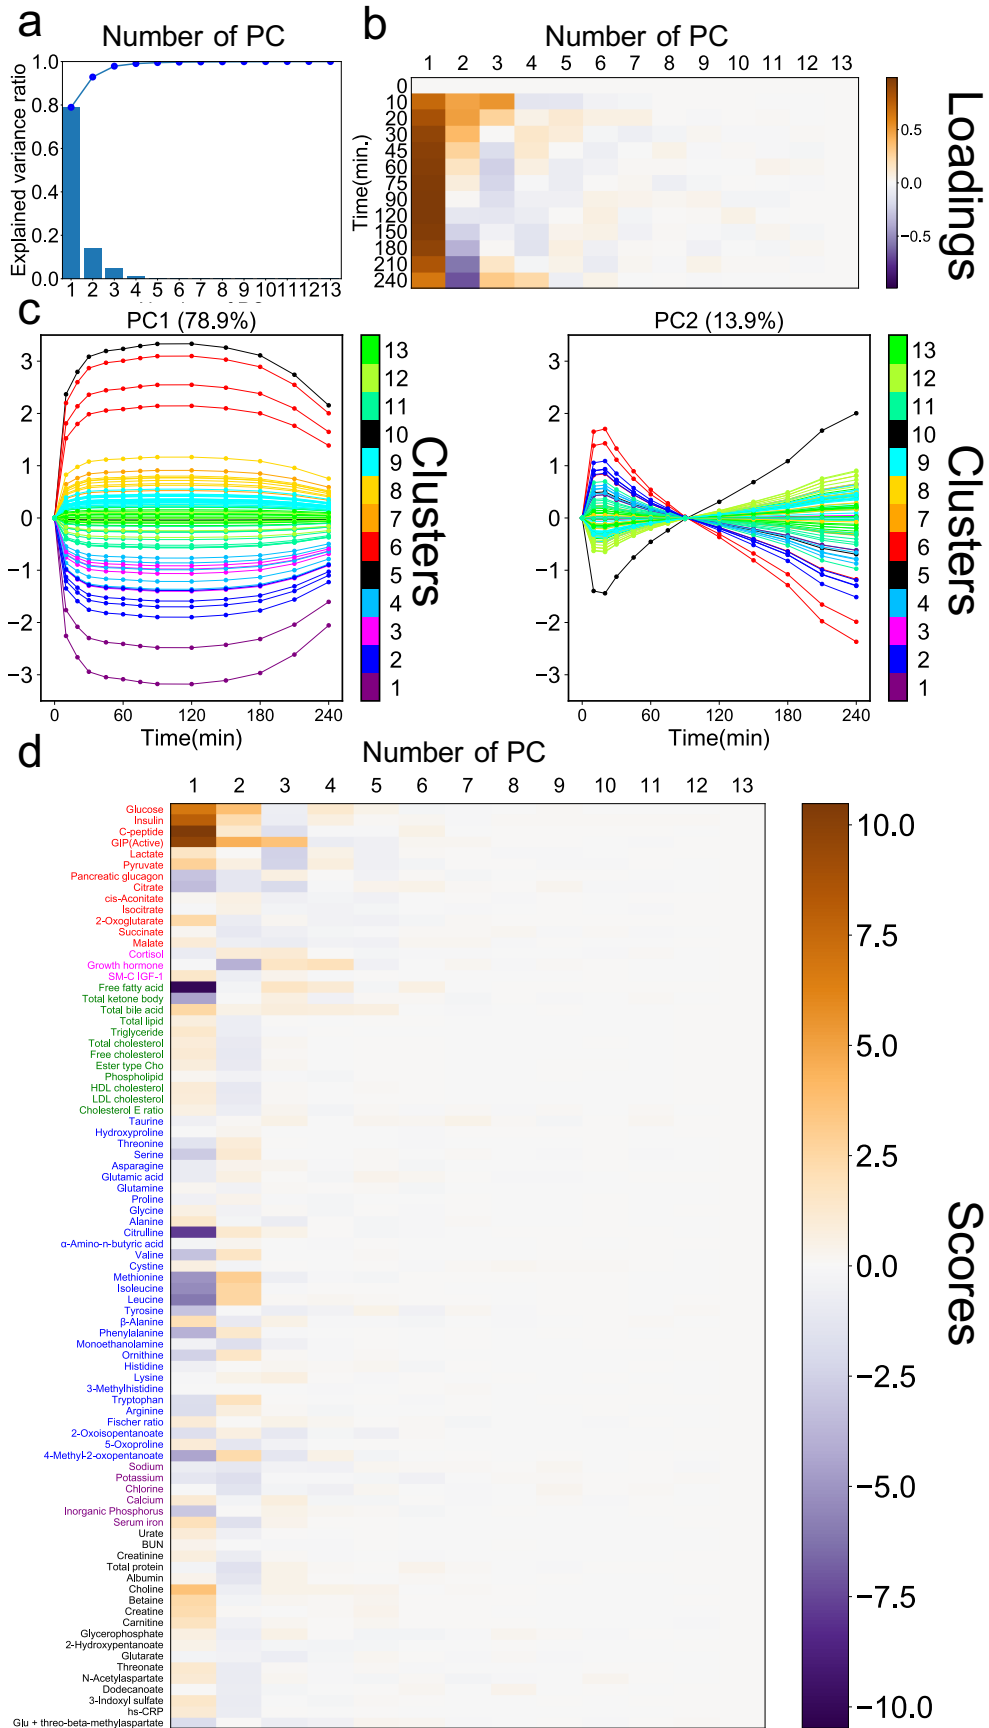

110 **Supplementary Figure 4 Principal component analysis of temporal patterns of**  
111 **molecules**

112 (a) The cumulative explained variance rate of the principal components (PC). (b) Heat map  
113 showing factor loading. (c) Time courses of factor loadings of PC1 (left) and PC2 (right).  
114 The lines indicate the time courses of factor loadings of each molecule. The colors of the  
115 lines indicate the clusters (numbered 1 to 13) as shown in the color bar to the right. The  
116 numbers in brackets indicate the explained variance rate of each PC. (d) Heat map of scores.  
117 Abbreviations for the molecules are follows: SM-C IGF-1, somatomedin-C insulin-like  
118 growth factor I; ester type Cho, ester type cholesterol; HDL cholesterol, high density  
119 lipoprotein cholesterol; LDL cholesterol, low density lipoprotein cholesterol; cholesterol E  
120 ratio, cholesterol ester ratio; BUN, blood urea nitrogen; hs-CRP, high-sensitivity C-reactive  
121 protein.

122

123

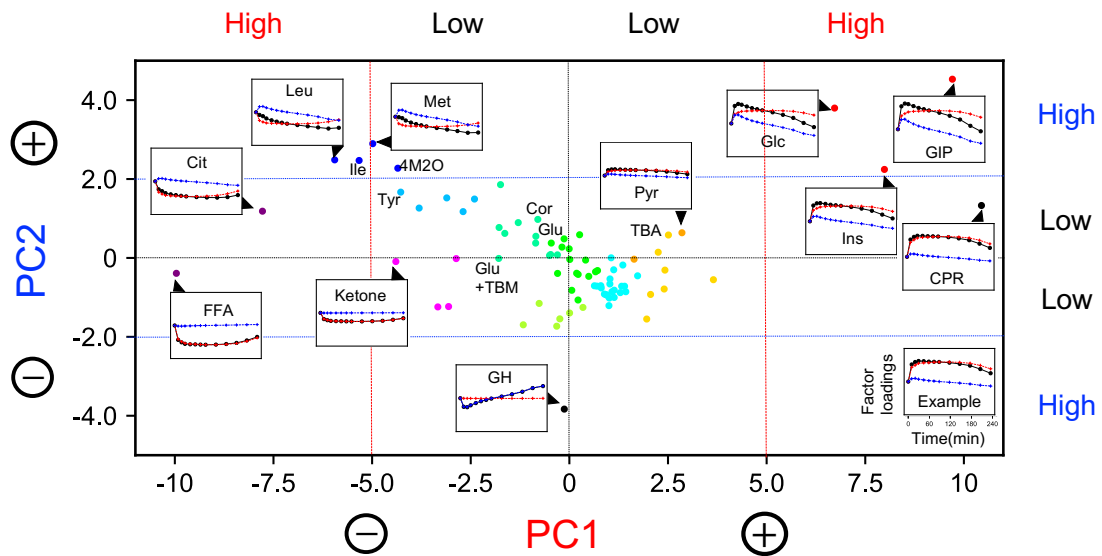

124

125

126

### Supplementary Figure 5 Temporal patterns explained by PC1 and PC2

127

Score plot of time courses of all molecules. The dots indicate the scores of molecules. The

128

colors of the dots correspond to the colors of the clusters classified by hierarchical clustering

129

analysis (Fig. 2). The small panels for 11 of the molecules show time courses of factor

130

loadings explained by PC1 (red dashed line) or PC2 (blue dashed line) and the sum of them

131

(black dashed line). The 18 molecules that showed a significant change after glucose

132

ingestion (Supplementary Figure 3) are labeled. A + or – symbol indicates the sign of each

133

PC. The dashed lines indicate the values that divide the range of PC1 (red) and PC2 (blue)

134

into four equal parts. The placement of the High and Low labels was determined by the

135

absolute value of each PC in positive and negative directions. Unit is shown in the lower

136

right panel (Example) .Note that “Factor loadings” is dimensionless. Abbreviations for the

137

18 molecules are follows: Cit, citrulline; Cor, cortisol; CRP, C-peptide; FFA, free fatty acids;

138

GH, growth hormone; Glu+TBM, Glu+threo-beta-methylasparate; GIP, gastric inhibitory

139

polypeptide (active); Glc, glucose; Glu, glutamic acid; Ile, isoleucine; Ins, insulin; Ketone,

140

total ketone bodies; Leu, leucine; Met, methionine; Pyr, pyruvate; TBA, total bile acid; Tyr,

141

tyrosine; 4M2O, 4-methyl-2-oxopentanoate.

142

143

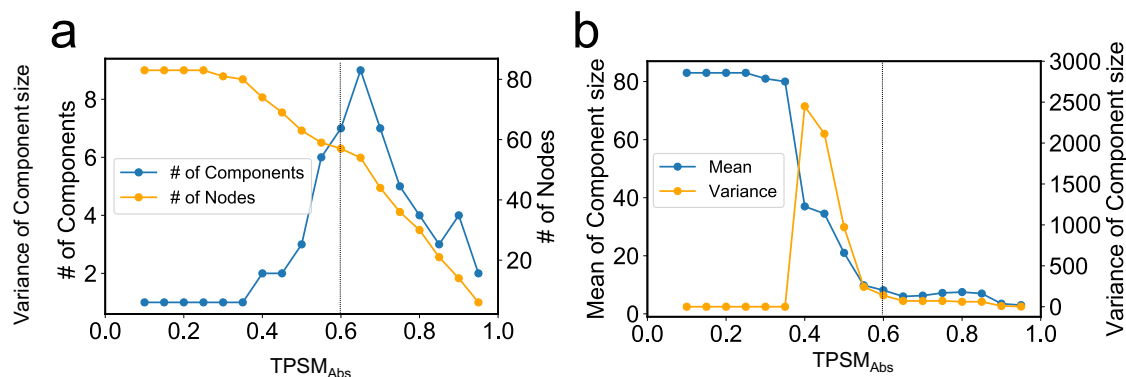

144  
 145  
 146  
 147  
 148  
 149  
 150  
 151  
 152  
 153  
 154  
 155  
 156  
 157  
 158  
 159  
 160  
 161  
 162  
 163  
 164  
 165  
 166

**Supplementary Figure 6 Components and nodes of connections of molecules for multiple thresholds of TPSM**

(a) Number of components (blue) and number of nodes (yellow) at the indicated threshold for the absolute value of the temporal pattern similarity among molecules (TPSM<sub>Abs</sub>). We define a component as a set of molecules that were not connected to any other molecule. Connections above the threshold were selected, and the numbers of components and nodes were counted. The dashed line represents the threshold (TPSM<sub>Abs</sub> = 0.6). (b) The mean of component size (blue) and the variance of component size (yellow) at different TPSM<sub>Abs</sub> thresholds. The dashed line indicates the threshold (TPSM<sub>Abs</sub> = 0.6). We examined the change in the mean of component size, the variance of the component size, the number of components, and the number of nodes at different TPSM<sub>Abs</sub> thresholds. We selected connections above the threshold and counted numbers of components and nodes. We also calculated the mean of component size and the variance of component size. For a TPSM<sub>Abs</sub> around the threshold, the gradual change in the number of nodes, the mean of component size, and the variance of component decrease, indicating that the relation between components does not change abruptly by changing the threshold of a TPSM<sub>Abs</sub>. However, because the number of components reaches a peak at the threshold of TPSM<sub>Abs</sub> = 0.65, we also examined the connection of molecules at different TPSM<sub>Abs</sub> thresholds (Supplementary Figure 7 and 8).



174 A) are connected. The colors of the molecules correspond to the metabolic group (top left).  
175 The colors of the lines indicate the positive or negative of TPSM values, and the thickness  
176 of the lines corresponds to the magnitude of  $TPSM_{Abs}$ , whereby the thicker the line, the  
177 greater the value (top center). Components (i to vi) are defined as a set of molecules that are  
178 not connected to any other molecule. Abbreviations for the molecules are follows: ester type  
179 Cho, ester type cholesterol; HDL cholesterol, high density lipoprotein cholesterol; LDL  
180 cholesterol, low density lipoprotein cholesterol; cholesterol E ratio, cholesterol ester ratio;  
181 BUN, blood urea nitrogen; Glu, glutamic acid. (c) Betweenness centrality for the molecules  
182 shown in part b. The connections consist of six independent components for the threshold of  
183  $TPSM_{Abs}$  at 0.55 (Supplementary Figure 7B, i-vi). For the connection for the threshold of  
184  $TPSM_{Abs}$  at 0.55, the majority of the molecules (41 out of 60) such as glucose metabolism-  
185 related molecules (glucose and insulin), amino acids, free fatty acids, and total ketone bodies  
186 were assigned to component iv. The amino acids and glucose metabolism-related molecules  
187 are directly connected through alanine and pyruvate, not through lipids, which is consistent  
188 with pyruvate degrading into alanine by glycolysis (Berg JM, et al., 2002). The other amino  
189 acids (citrulline, arginine, and leucine), mediated amino acids, and glucose metabolism-  
190 related molecules are directly connected through the lipids. The betweenness centrality of  
191 the glucose was 0.1 and was the highest of all molecules.  
192  
193



202 are connected. Abbreviations for the molecules are follows: ester type Cho, ester type  
203 cholesterol; HDL cholesterol, high density lipoprotein cholesterol; LDL cholesterol, low  
204 density lipoprotein cholesterol; cholesterol E ratio, cholesterol ester ratio; BUN, blood urea  
205 nitrogen; Glu, glutamic acid. (c) Betweenness centrality of the molecules in part b. The  
206 connections consist of nine independent components for the threshold of  $TPSM_{Abs}$  at 0.65  
207 (Supplementary Figure 8B, i-ix). For the connection for the threshold of  $TPSM_{Abs}$  at 0.65,  
208 molecules such as amino acids, free fatty acids, and total ketone bodies made up component  
209 viii (part b), whereas glucose metabolism-related molecules were not included in this  
210 component. This is the reason why the number of components was increased (Supplementary  
211 Figure 6). Citrulline mediated the lipids and other amino acids, which indicated that the  
212 connection between the lipids and the amino acids through citrulline was stronger than the  
213 connection between the glucose metabolism-related molecules and the amino acids through  
214 the lipids. Taken together with Supplementary Figure 7, lowering the threshold resulted in  
215 the connection of amino acids other than citrulline to lipid and glucose metabolism-related  
216 molecules, whereas increasing the threshold resulted in the loss of connection between lipid  
217 and glucose metabolism-related molecules. Thus, depending on the threshold, some amino  
218 acids showed a temporal pattern similar to lipids and glucose metabolism-related molecules  
219 such as free fatty acids and lactate, whereas citrulline was the molecule that showed the  
220 temporal pattern most similar to free fatty acids.

221

222



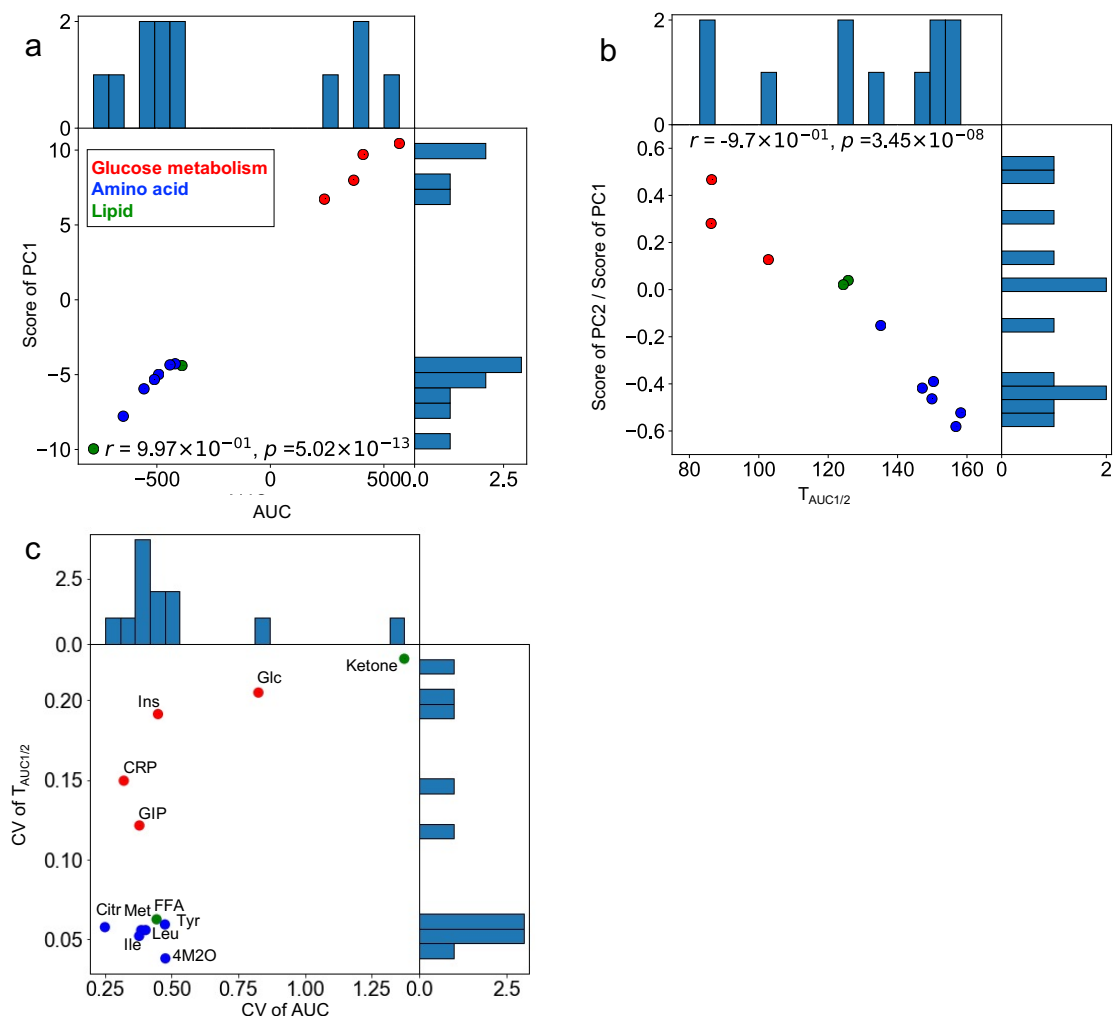

223

224 **Supplementary Figure 9 AUC,  $T_{AUC1/2}$ , and principal component scores**

225 (a) The distribution of the area under the curve (AUC) of 13 molecules and the score of  
 226 principal component 1 (PC1). The color of the dots indicates the metabolic group. In  
 227 the upper left,  $r$  and  $p$  indicate the correlation coefficient and  $p$ -value, respectively. (b) The  
 228 distribution of the response of the temporal pattern of the molecule ( $T_{AUC1/2}$ ) of 13 molecules  
 229 and the ratio of the score of PC1 and principal component 2 (PC2). The color of the dots  
 230 indicates the metabolic group (see inset in part A). In the upper right,  $r$  and  $p$  indicate the  
 231 correlation coefficient and  $p$  value, respectively. Note that only molecules with a high response  
 232 amplitude were targeted (Supplementary Figure 5). (c) The distribution of the coefficient of  
 233 variation (CV) of AUC and  $T_{AUC1/2}$ . Molecules are labeled as follows: Cit, citrulline; CRP, C-

234 peptide; FFA, free fatty acids; GIP, gastric inhibitory polypeptide (active); Glc, glucose; Ile,  
235 isoleucine; Ins, insulin; Ketone, total ketone bodies; Leu, leucine; Met, methionine; Tyr,  
236 tyrosine; 4M2O, 4-methyl-2-oxopentanoate. Amino acids and free fatty acids had low CVs of  
237 both AUC and  $T_{AUC1/2}$ . Glucose and Total ketone bodies had high CVs of both AUC and  $T_{AUC1/2}$ .  
238 Glucose metabolism-related molecules, except glucose, had low CVs of AUC, but high CV of  
239  $T_{AUC1/2}$ .

240

#### 241 **Supplementary Data 1 Metabolites and hormones data**

242 Metabolites and hormones data in healthy human before and after oral glucose ingestion.

243

#### 244 **Supplementary Data 2 Characteristics of temporal patterns of molecules**

245 Characteristics of temporal patterns of molecules

246

#### 247 **Supplementary Data 3 Molecules exhibiting the similar temporal patterns**

248 Molecules exhibiting the similar temporal patterns

249

#### 250 **Supplementary Data 4 Correlation of changed significantly by glucose ingestion 251 with individual characteristics**

252 Correlation of changed significantly by glucose ingestion with individual characteristics

253

#### 254 **Supplementary Data 5 Measurement methods of some metabolites and hormones**

255 Measurement methods of some metabolites and hormones

256

#### 257 **Supplementary Data 6 The amino acid fraction measured by LC-MS**

258 The amino acid fraction measured by LC-MS

259

#### 260 **Supplementary Data 7 Molecules measured by CE-TOFMS**

261 Molecules measured by CE-TOFMS

262

#### 263 **Supplementary Data 8 The percentage of missing points of 25 molecules including 264 at least one or more missing points**

265 The percentage of missing points of 25 molecules including at least one or more missing points

266

#### 267 **Supplementary Data 9 Classification of molecules**

268 Classification of molecules
